# Supplementary material for: Investigation on the structure–activity relationship of BaO promoting Pd/CeO2–ZrO2 catalysts for CO, HC and NOx conversions
Source: Royal Society of Chemistry journal article supplement (doi:10.1039/c6cp08459a), 2017-01-01
Supplement: c6cp08459a1.pdf [file c6cp08459a1.pdf]

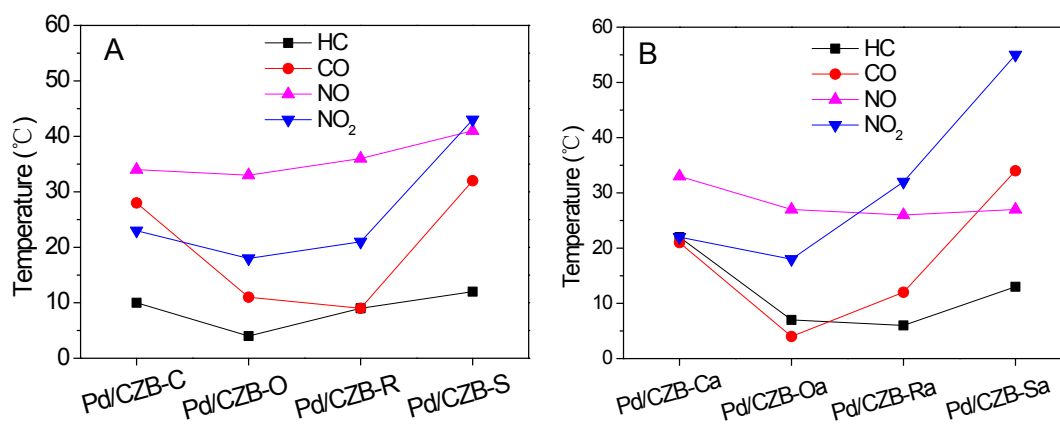

Fig. S1 The change of light-off temperature ( $T_{50\%}$ ) (A) and full-conversion temperature ( $T_{90\%}$ ) (B) of HC, CO, NO and  $\text{NO}_2$  over catalysts before and after aged.
